# Supplementary material for: The first imported case of Rift Valley fever in China reveals a genetic reassortment of different viral lineages
Source: PubMed Central journal article supplement (PMC5285499; doi:10.1038/emi.2016.136), 2017-01-18
Supplement: emi2016136x1.pdf [file emi2016136x1.pdf]

| Cytokine/chemokine | Patient <sup>b</sup>                         | Healthy controls, <i>n</i> = 7 |             | Panel in<br>Figure 3 |
|--------------------|----------------------------------------------|--------------------------------|-------------|----------------------|
|                    |                                              | Mean                           | 95% CI      |                      |
| CTACK <sup>c</sup> | <b>378.5<sup>d</sup></b>                     | 89.9                           | 51.5-128.2  |                      |
| Eotaxin            | 34.1                                         | 32.3                           | 20.1-44.5   |                      |
| FGF basic          | 14.4                                         | 12.0                           | 5.9-18.1    |                      |
| G-CSF              | <b>26.7</b>                                  | 7.8                            | 5.9-9.7     |                      |
| GM-CSF             | 18.6                                         | 12.6                           | 4.1-21.1    |                      |
| GRO $\alpha$       | <b>44.6</b>                                  | 22                             | 8.6-35.5    | 3G                   |
| $\beta$ -NGF       | <b>3.7</b>                                   | 0.2                            | 0.2-0.2     |                      |
| HGF                | <b>3844.3</b>                                | 48.6                           | 27.1-70.2   | 3B                   |
| IFN- $\gamma$      | <b>63.8</b>                                  | 51.1                           | 40.5-61.7   | 3J                   |
| IL-10              | 4.5                                          | 3.9                            | 0-7.9       |                      |
| IL-12p70           | 1.2                                          | 7.4                            | 1.5-13.3    |                      |
| IL-13              | 1.2                                          | 1.8                            | 1.3-2.2     | 3I                   |
| IL-16              | <b>390.0</b>                                 | 35.4                           | 15.2-55.6   |                      |
| IL-17              | 5.2                                          | 14.9                           | 6.8-23.0    |                      |
| IL-18              | <b>82.9</b>                                  | 11.4                           | 6.4-16.4    | 3F                   |
| IL-1 $\beta$       | 0.8                                          | 0.8                            | 0.5-1.1     | 3K                   |
| IL-1Ra             | <b>63.3</b>                                  | 28.2                           | 17.5-38.9   | 3J                   |
| IL-2               | 1.5                                          | 3.6                            | 1.8-5.4     | 3K                   |
| IL-2Ra             | <b>66.1</b>                                  | 1.2                            | -0.5-2.9    | 3G                   |
| IL-3               | 177.8                                        | 99.8                           | 39.0-178.3  | 3J                   |
| IL-4               | 2.2                                          | 2.7                            | 2.4-2.9     |                      |
| IL-5               | 1.8                                          | 2.7                            | 2.1-3.3     |                      |
| IL-6               | <b>14</b>                                    | 2.0                            | 0.8-3.1     | 3L                   |
| IL-7               | <b>2.7</b>                                   | 2.0                            | 1.3-2.6     | 3K                   |
| IL-8               | 17.2                                         | 25.1                           | 2.7-47.5    |                      |
| IL-9               | 9.9                                          | 31.7                           | 12.5-51.0   | 3I                   |
| IP10               | <b>OOR &gt;<sup>e</sup></b>                  | 206.4                          | 141.1-271.6 | 3E                   |
| MCP-1              | <b>30.0</b>                                  | 7.4                            | 0.9-13.9    | 3F                   |
| M-CSF              | 32.6                                         | 21.7                           | 5.0-38.4    | 3G                   |
| MIF                | <b>190.4</b>                                 | 12.3                           | 8.6-16.1    |                      |
| MIG                | <b>5041.3</b>                                | 59.1                           | 37.8-80.4   |                      |
| MIP-1a             | 0.6                                          | 1.5                            | 0.8-2.1     |                      |
| MIP-1b             | 24.7                                         | 40.7                           | 29.3-52.1   |                      |
| PDGF-bb            | 295.4                                        | 502.4                          | 372.3-632.5 | 3D                   |
| SCF                | <b>91.1</b>                                  | 7.4                            | 6.1-8.6     |                      |
| SCGF- $\beta$      | <b>2.26<math>\times</math>10<sup>5</sup></b> | 2128.0                         | 1455-2801   | 3E                   |
| SDF-1 $\alpha$     | <b>89.3</b>                                  | 16.1                           | 11.9-20.4   |                      |
| TNF- $\alpha$      | 8.2                                          | 10.9                           | 9.0-12.7    | 3H                   |
| TNF- $\beta$       | <b>3.7</b>                                   | 0.1                            | 0.1-0.2     | 3C                   |
| TRAIL              | <b>12.5</b>                                  | 7.3                            | 5.4-9.2     |                      |
| VEGF               | 6.8                                          | 22.9                           | 7.3-38.5    |                      |

**Supplementary Table S1** The plasma cytokines and chemokines<sup>a</sup> on admission (Day 7 post disease onset).

<sup>a</sup> Levels are given in pg/mL.

<sup>b</sup> The cytokines and chemokines in the plasma collected on the first day of hospitalization (Day 7) were tested.

<sup>c</sup> Abbreviations: CTACK, cutaneous T cell-attracting chemokine; FGF, fibroblast growth factor; G-CSF, granulocyte colony stimulating factor; GM-CSF, granulocyte macrophage colony-stimulating factor; GRO, growth-regulated oncogene;  $\beta$ -NGF,  $\beta$ -nerve growth factor; HGF, hepatocyte growth factor; IFN- $\gamma$ , interferon-gamma; IL, interleukin; IL-1Ra, IL-1 receptor antagonist; IP10, interferon gamma-induced protein 10; MCP, monocyte chemoattractant protein; M-CSF, macrophage colony-stimulating factor; MIF, macrophage migration inhibitory factor; MIG, macrophage-induced gene; MIP, macrophage inflammatory protein; PDGF, platelet-derived growth factor; SCF, stem cell factor; SCGF- $\beta$ , stem cell growth factor; SDF, stromal cell-derived factor; TNF, tumor necrosis factor; TRAIL, TNF-related apoptosis-inducing ligand; VEGF, vascular endothelial growth factor.

<sup>d</sup> The cytokines and chemokines that are higher than the upper 95% CI of healthy controls are denoted in bold font.

<sup>e</sup> The "OOR >": Out of range above, which means larger than the highest concentration in the standard curve. The highest concentration of IP10 standard curve is 13518.8 pg/mL.
